# Supplementary material for: A comparative reference study for the validation of HLA‐matching algorithms in the search for allogeneic hematopoietic stem cell donors and cord blood units
Source: PubMed Central journal article supplement — HLA. 2016 May 24;87(6):439–48. doi: 10.1111/tan.12817 (PMC5089599; doi:10.1111/tan.12817), 2016-05-24
Supplement: TAN-87-439-s001.pdf [file TAN-87-439-s001.pdf]

Table S2: Types of HLA assignments used and their resolution

| <b>Assignment</b>      | <b>Resolution</b> | <b>Example</b>  |
|------------------------|-------------------|-----------------|
| Serological / Antigen  | low               | DR14            |
| XX-code                | low               | DRB1*14:XX      |
| Multiple allele code   | non-high          | DRB1*14:MAC     |
| ARD group (two fields) | high              | DRB1*14:01g     |
| Allele                 | high              | DRB1*14:01      |
| WMDA extension         | n/a               | UUUU (untested) |
