# Supplementary material for: A comparative reference study for the validation of HLA‐matching algorithms in the search for allogeneic hematopoietic stem cell donors and cord blood units
Source: PubMed Central journal article supplement — HLA. 2016 May 24;87(6):439–48. doi: 10.1111/tan.12817 (PMC5089599; doi:10.1111/tan.12817), 2016-05-24
Supplement: TAN-87-439-s005.pdf [file TAN-87-439-s005.pdf]

Table S1: Characteristics of the matching validation tasks and associated data sets with 1,000 patients and 10,000 donors each

|                                           | MVT/MVS 1  | MVT/MVS 2  | MVT/MVS 3           |
|-------------------------------------------|------------|------------|---------------------|
| <b>Basic parameters</b>                   |            |            |                     |
| HLA loci considered for matching          | A, B, DRB1 | A, B, DRB1 | A, C, B, DRB1, DQB1 |
| IPD-IMGT/HLA Database version             | 2.16.0     | 2.16.0     | 3.4.0               |
| <b>Patient data</b>                       |            |            |                     |
| serologic designations                    | 0.0%       | 10.4%      | 0.0%                |
| 1st-field allele designations (XX codes)  | 12.0%      | 0.0%       | 14.0%               |
| multiple allele codes (no ARD groups)     | 39.3%      | 38.4%      | 15.4%               |
| 2 field allele designations or ARD groups | 48.7%      | 51.2%      | 70.6%               |
| <b>Donor data</b>                         |            |            |                     |
| serologic designations                    | 0.0%       | 61.8%      | 0.0%                |
| 1st-field allele designations (XX codes)  | 61.1%      | 0.0%       | 60.8%               |
| multiple allele codes (no ARD groups)     | 23.9%      | 23.5%      | 32.9%               |
| 2 field allele designations or ARD groups | 15.0%      | 14.7%      | 6.3%                |
| without HLA-C                             | n/a        | n/a        | 80%                 |
| without HLA-DRB1                          | 0%         | 0%         | 10%                 |
| without HLA-DQB1                          | n/a        | n/a        | 90%                 |
| <b>HLA matching</b>                       |            |            |                     |
| allele level matching                     | ✓          | ✓          | ✓                   |
| antigen level matching                    |            | ✓          |                     |
| probabilistic matching                    |            |            | ✓                   |
