# Supplementary material for: A comparative reference study for the validation of HLA‐matching algorithms in the search for allogeneic hematopoietic stem cell donors and cord blood units
Source: PubMed Central journal article supplement — HLA. 2016 May 24;87(6):439–48. doi: 10.1111/tan.12817 (PMC5089599; doi:10.1111/tan.12817), 2016-05-24
Supplement: TAN-87-439-s007.pdf [file TAN-87-439-s007.pdf]

Table S3: Counting mismatches for 2 by 2 comparisons of patient and donor alleles. A, B, C, D stand for pairwise mismatched expressed alleles, N codes a null allele. The column #GvH gives the number of mismatches in Graft vs. Host direction, #HvG the number of mismatches in Host vs. Graft direction. The column #Max gives the maximum of the columns #GvH and #HvG. The application of this counting schema to allelic ambiguities is described in section "Matching with allelic ambiguities" of the WMDA HLA matching framework (18). Alterations to the original table given in this publication are shown in red.

| Patient | Donor | #GvH     | #HvG     | #Max     |
|---------|-------|----------|----------|----------|
| AB      | AB    | 0        | 0        | 0        |
| AA      | AA    | 0        | 0        | 0        |
| AA      | NA    | 0        | 0        | 0        |
| NA      | AA    | 0        | 0        | 0        |
| NA      | NA    | 0        | 0        | 0        |
| NN      | NN    | 0        | 0        | 0        |
| AA      | AB    | 0        | 1        | 1        |
| NA      | AB    | 0        | 1        | 1        |
| NN      | NA    | 0        | 1        | 1        |
| AB      | AA    | 1        | 0        | 1        |
| AB      | NA    | 1        | 0        | 1        |
| NA      | NN    | 1        | 0        | 1        |
| AB      | AC    | 1        | 1        | 1        |
| NA      | NB    | 1        | 1        | 1        |
| NN      | AA    | 0        | <b>2</b> | <b>2</b> |
| NN      | AB    | 0        | 2        | 2        |
| AA      | NN    | <b>2</b> | 0        | <b>2</b> |
| AB      | NN    | 2        | 0        | 2        |
| AA      | BB    | <b>2</b> | <b>2</b> | <b>2</b> |
| AA      | NB    | <b>2</b> | <b>2</b> | <b>2</b> |
| NA      | BB    | <b>2</b> | <b>2</b> | <b>2</b> |
| AA      | BC    | <b>2</b> | 2        | 2        |
| NA      | BC    | <b>2</b> | 2        | 2        |
| AB      | CC    | 2        | <b>2</b> | 2        |
| AB      | NC    | 2        | <b>2</b> | 2        |
| AB      | CD    | 2        | 2        | 2        |
