# Supplementary material for: A comparative reference study for the validation of HLA‐matching algorithms in the search for allogeneic hematopoietic stem cell donors and cord blood units
Source: PubMed Central journal article supplement — HLA. 2016 May 24;87(6):439–48. doi: 10.1111/tan.12817 (PMC5089599; doi:10.1111/tan.12817), 2016-05-24
Supplement: TAN-87-439-s009.pdf [file TAN-87-439-s009.pdf]

Table S4: Soft- and hardware environment of the HMA implementations used for this experiment ordered by affiliation superscript. This order does not correspond with the arbitrary numbering of the participants used in the publication.

|                                            | ZKRD                                                                                                        | NMDP                                                                         | ANRI                                                                                                                 | CSCR                                                                                                       | DKMS                                                                                  | FGM                           | BMDW                    |
|--------------------------------------------|-------------------------------------------------------------------------------------------------------------|------------------------------------------------------------------------------|----------------------------------------------------------------------------------------------------------------------|------------------------------------------------------------------------------------------------------------|---------------------------------------------------------------------------------------|-------------------------------|-------------------------|
| <b>Program name</b>                        | OptiMatch <sup>®</sup>                                                                                      | HapLogic <sup>™</sup>                                                        | Genius                                                                                                               | Prometheus                                                                                                 | Hap-E Search <sup>®</sup>                                                             | Syrenad match                 | BMDWmatch               |
| <b>Operating system, etc.</b>              | Linux                                                                                                       | Linux                                                                        | MS Windows <sup>®</sup>                                                                                              | MS Windows <sup>®</sup>                                                                                    | Linux, Oracle <sup>®</sup>                                                            | Linux                         | MS Windows <sup>®</sup> |
| <b>Architecture</b>                        | x86_64                                                                                                      | x86_64                                                                       | x86                                                                                                                  | x86                                                                                                        | x86_64                                                                                | x86_64                        | x86                     |
| <b>Languages</b>                           | Object Pascal, BASM                                                                                         | Java                                                                         | T-SQL, C#                                                                                                            | Object Pascal                                                                                              | SQL, PL/SQL                                                                           | PL/SQL                        | Object Pascal           |
| <b>Speed optimizations</b>                 | memory persistent HLA reference data, HF data; software caching; hand-optimized inline assembler code; etc. | memory persistent HLA reference data, HF data; donor registry data; trimming | indexed lookup table for HF data; distinct donor phenotype list to prevent repeated genotype lookups; multithreading | special indices for haplotypes; maximum of data in RAM; HLA nomenclature filtering based on frequency data | indexing system for HLA nomenclature; preassembling of HF data in tree-like structure | indexing system for donor HLA | in-memory lookup tables |
| <b>Trimming of set of diplotypes</b>       | No                                                                                                          | Yes                                                                          | No                                                                                                                   | No                                                                                                         | No                                                                                    | n/a                           | n/a                     |
| <b>Loading of DNA-to-serology mappings</b> | Yes                                                                                                         | Yes                                                                          | Yes                                                                                                                  | Yes                                                                                                        | Yes                                                                                   | No                            | No                      |
| <b>Loading of haplotype frequencies</b>    | Yes                                                                                                         | Yes                                                                          | Yes                                                                                                                  | Yes                                                                                                        | Yes                                                                                   | n/a                           | n/a                     |
